# Supplementary material for: Biomimic opto-nanobiointerface enables multiscale biomodulation
Source: Research Square preprint supplement (doi:10.21203/rs.3.rs-5333854/v1), 2024-12-24
Supplement: Supplementary file 1 [file e2ab0056589c6b0519d9c758.docx]

Supplementary Materials

**Biomimic opto-nanobiointerface enables multiscale biomodulation**

**Authors**

Christoph Alexander Müller1, Yuge Zhang2, Lingyuan Meng3, Jesper Guldsmed Madsen4, Kjeld Kaj Klompmaker1, Thomas Stax Jakobsen4,5, Asbjørn C. Jørgensen5,6, Anne Louise Askou5,4, Ge Huang7, Wen Li8, Rasmus Schmidt Davidsen6, Toke Bek4, Nikos S. Hatzakis7, Thomas J. Corydon5,4, Mingdong Dong2, Bozhi Tian8,9,10, and Menglin Chen*1,2

**Affiliations**

1Department of Biological and Chemical Engineering, Aarhus University, 8000 Aarhus C, Denmark.

2Interdisciplinary Nanoscience Center, Aarhus University, 8000 Aarhus C, Denmark.

3Pritzker School of Molecular Engineering, University of Chicago, Chicago, IL, USA.

4Department of Ophthalmology, Aarhus University Hospital, 8200 Aarhus N, Denmark.

5Department of Biomedicine, Aarhus University, 8000 Aarhus C, Denmark

6Department of Electrical and Computer Engineering, Aarhus University, 8000 Aarhus C, Denmark.

7Department of Chemistry & Nanoscience Center, University of Copenhagen, 1172 Copenhagen, Denmark

8Department of Chemistry, University of Chicago, Chicago, IL, USA.

9The James Franck Institute, University of Chicago, Chicago, IL, USA.

10The Institute for Biophysical Dynamics, University of Chicago, Chicago, IL, USA.

Email: [menglin@bce.au.dk](mailto:menglin@bce.au.dk)

**This Supplementary file includes:**

Fig. S1 to S7

**Other Supplementary Materials for this manuscript include the following:**

Videos S1 to S12


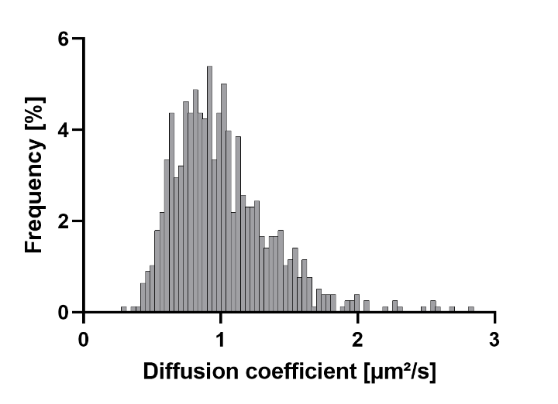


Fig. S1.

Diffusion coefficient distribution of hg-C3N4 derived from particle tracking analysis.

**
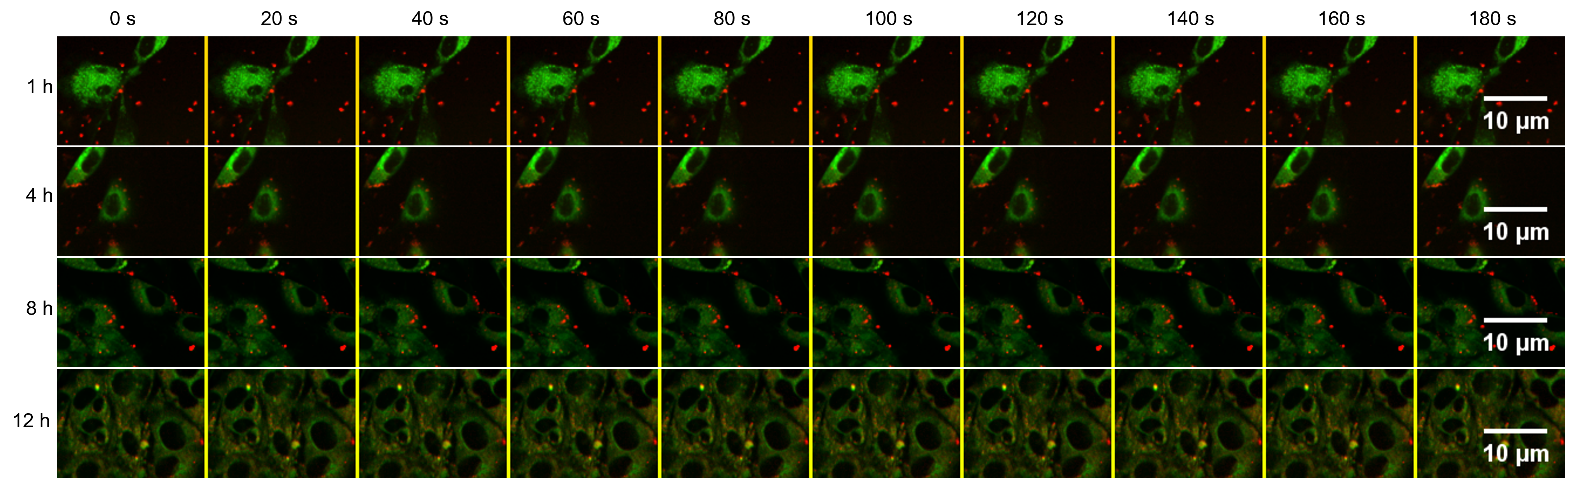
**

Fig. S2.

**Images acquired with SPT used for colocalization study.** NIH/3T3 fibroblasts where lysosomes are stained with LysoTracker Deep Red (green) and hg-C3N4 NP excited with 488 nm shown in red. The cells were imaged at 1h, 4h, 8h, and 12h with 1 frame per 20 seconds for 3 min.


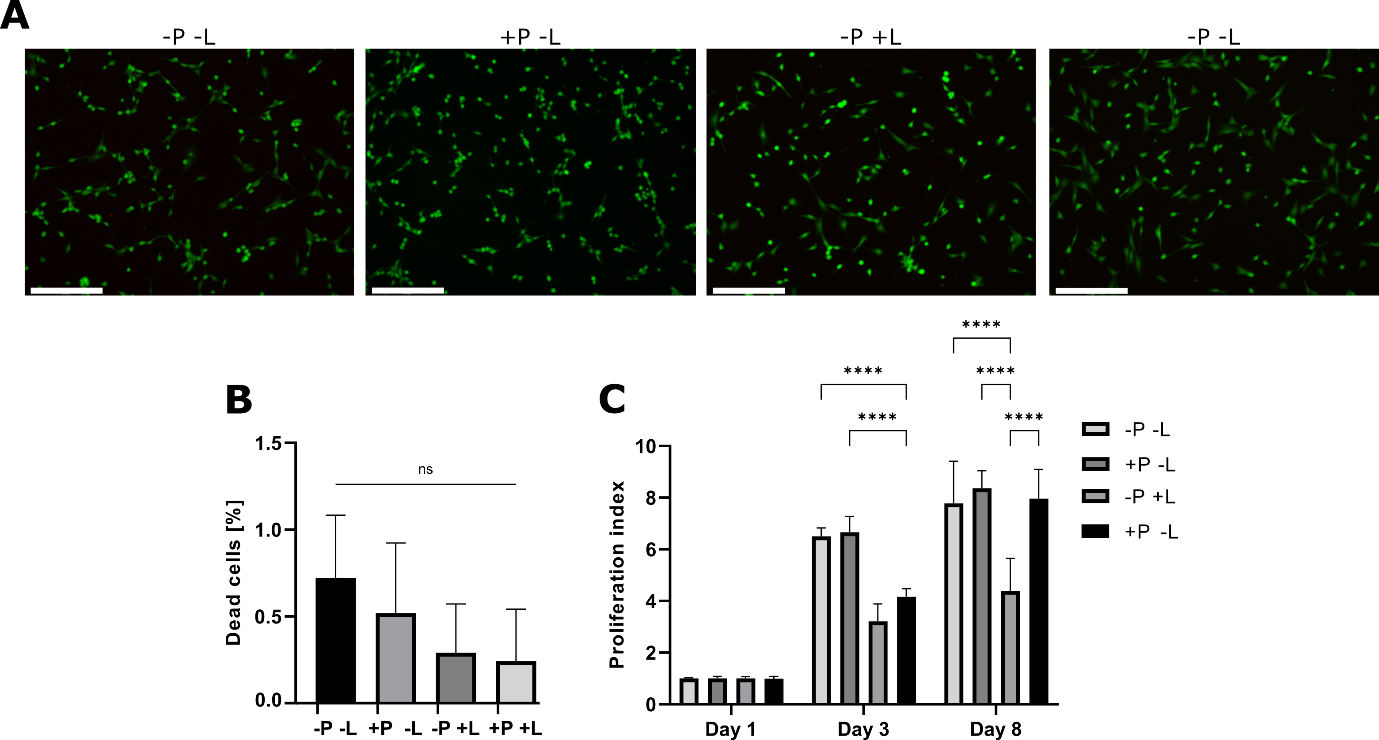


Fig. S3.

**Cytocompatibility of hg-C3N4.** **(A)** Live dead staining of NIH/3T3 fibroblasts with **(B)** percentage of dead cells based on live dead staining and **(C)** CCK-8 proliferation assay of NIH/3T3 cells cultured with 2.0 µg/cm2 hg-C3N4 (+P), cultured without hg-C3N4 (-P), light treated (+L), and non-light treated (-L). Light-treated groups were irradiated with a 450 nm blue light (75 mW/cm2, 1 Hz, 100 ms pulse) for 10 minutes bidaily. Statistical analysis was performed with one-way ANOVA and Tukey’s test for multiple comparisons where p<0.0001 is denoted as **** with n=7 and ns=no significance (p>0.05)


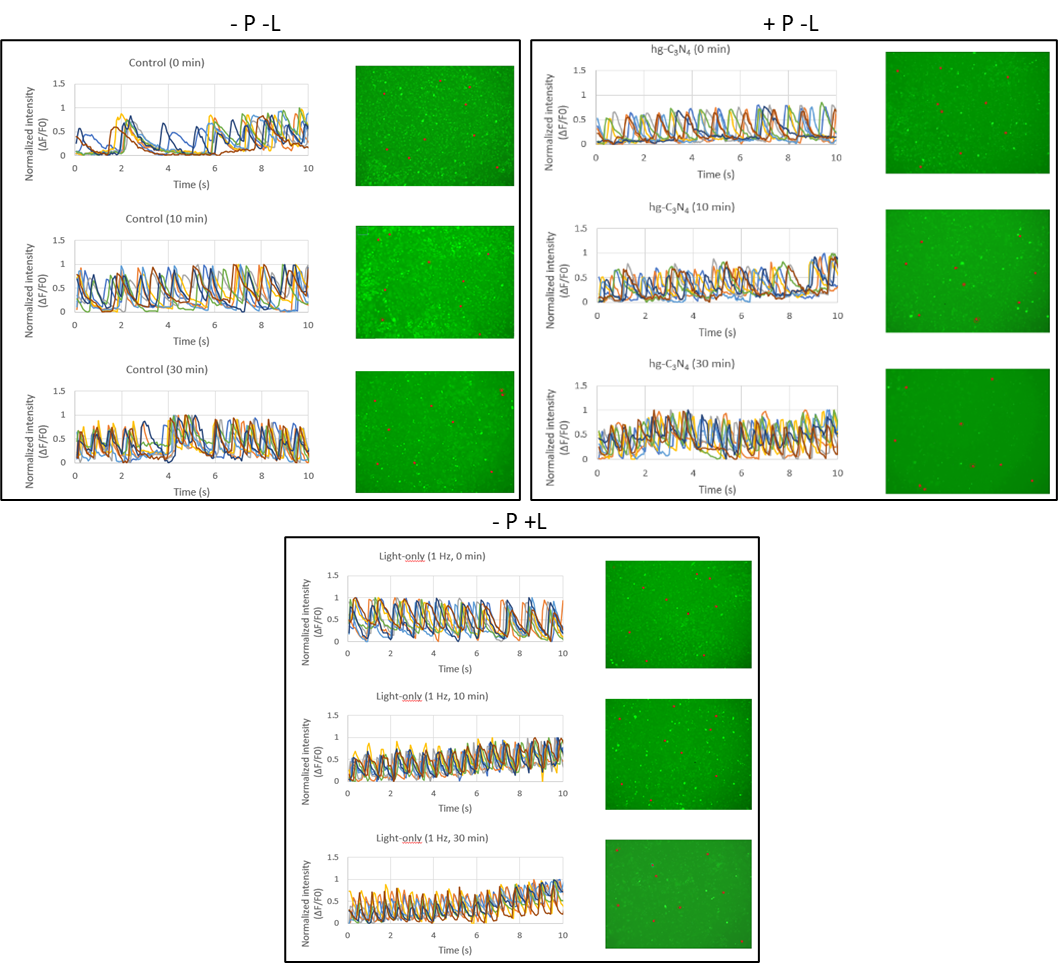


Fig. S4.

**Control groups for HL-1 cardiomyocyte pacing**. HL-1 cells stained with fluo-4 calcium stain incubated with or without 2.0 µg/cm2 hg-C3N4 particles (+P; -P) and with or without photostimulation photostimulation (+L; -L) at 0 min, 10 min, and 30 min. Red circles indicate ROIs for ΔF/F0 plots. ΔF/F0 plots show 8 different ROIs showing beating frequency of HL-1 cells. Light source was 10 mW/cm2 of 450 nm with pulse width of 100 ms and 1 Hz frequency.


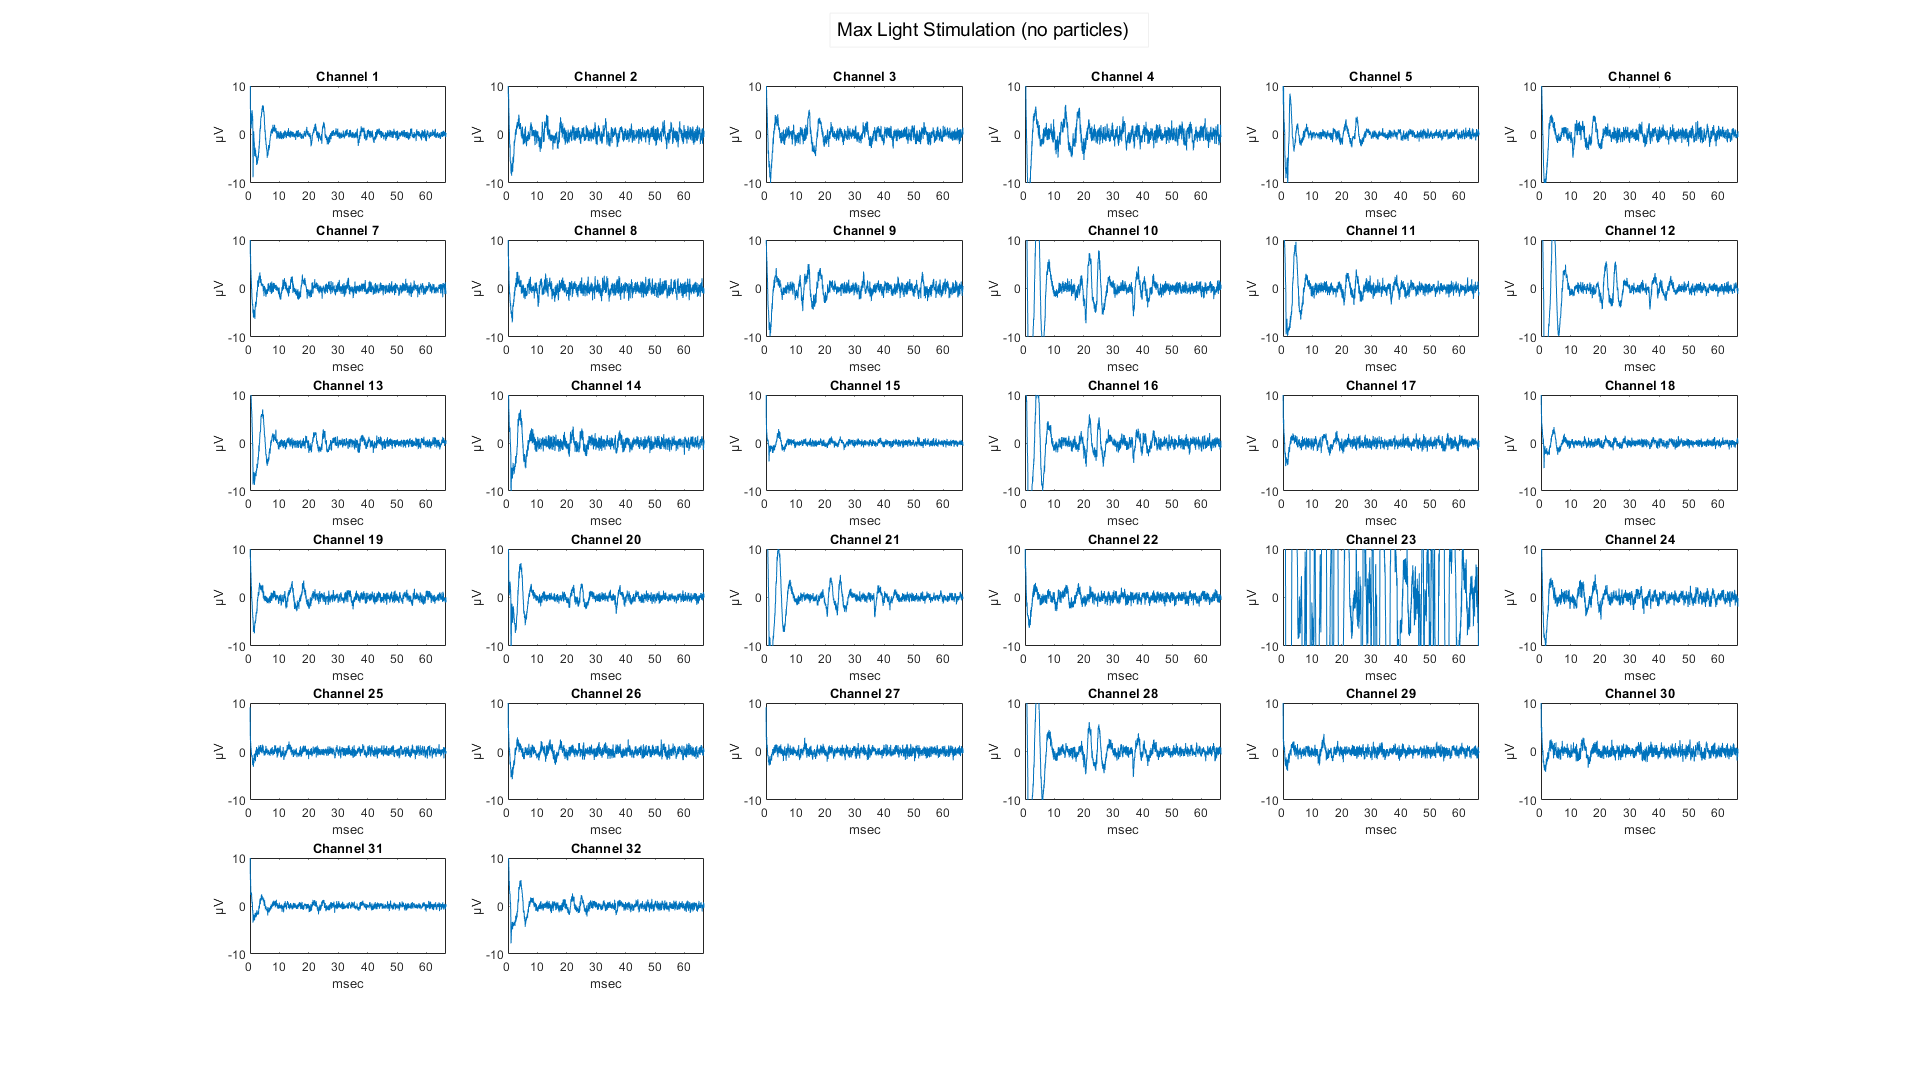


Fig. S5

Stimulation response data of all 32 MEA channels before applying particles with LED stimulation of 1 msec duration. Stimulus artefact and evoked light responses can be seen on all channels, except channel 23 which malfunctioned.


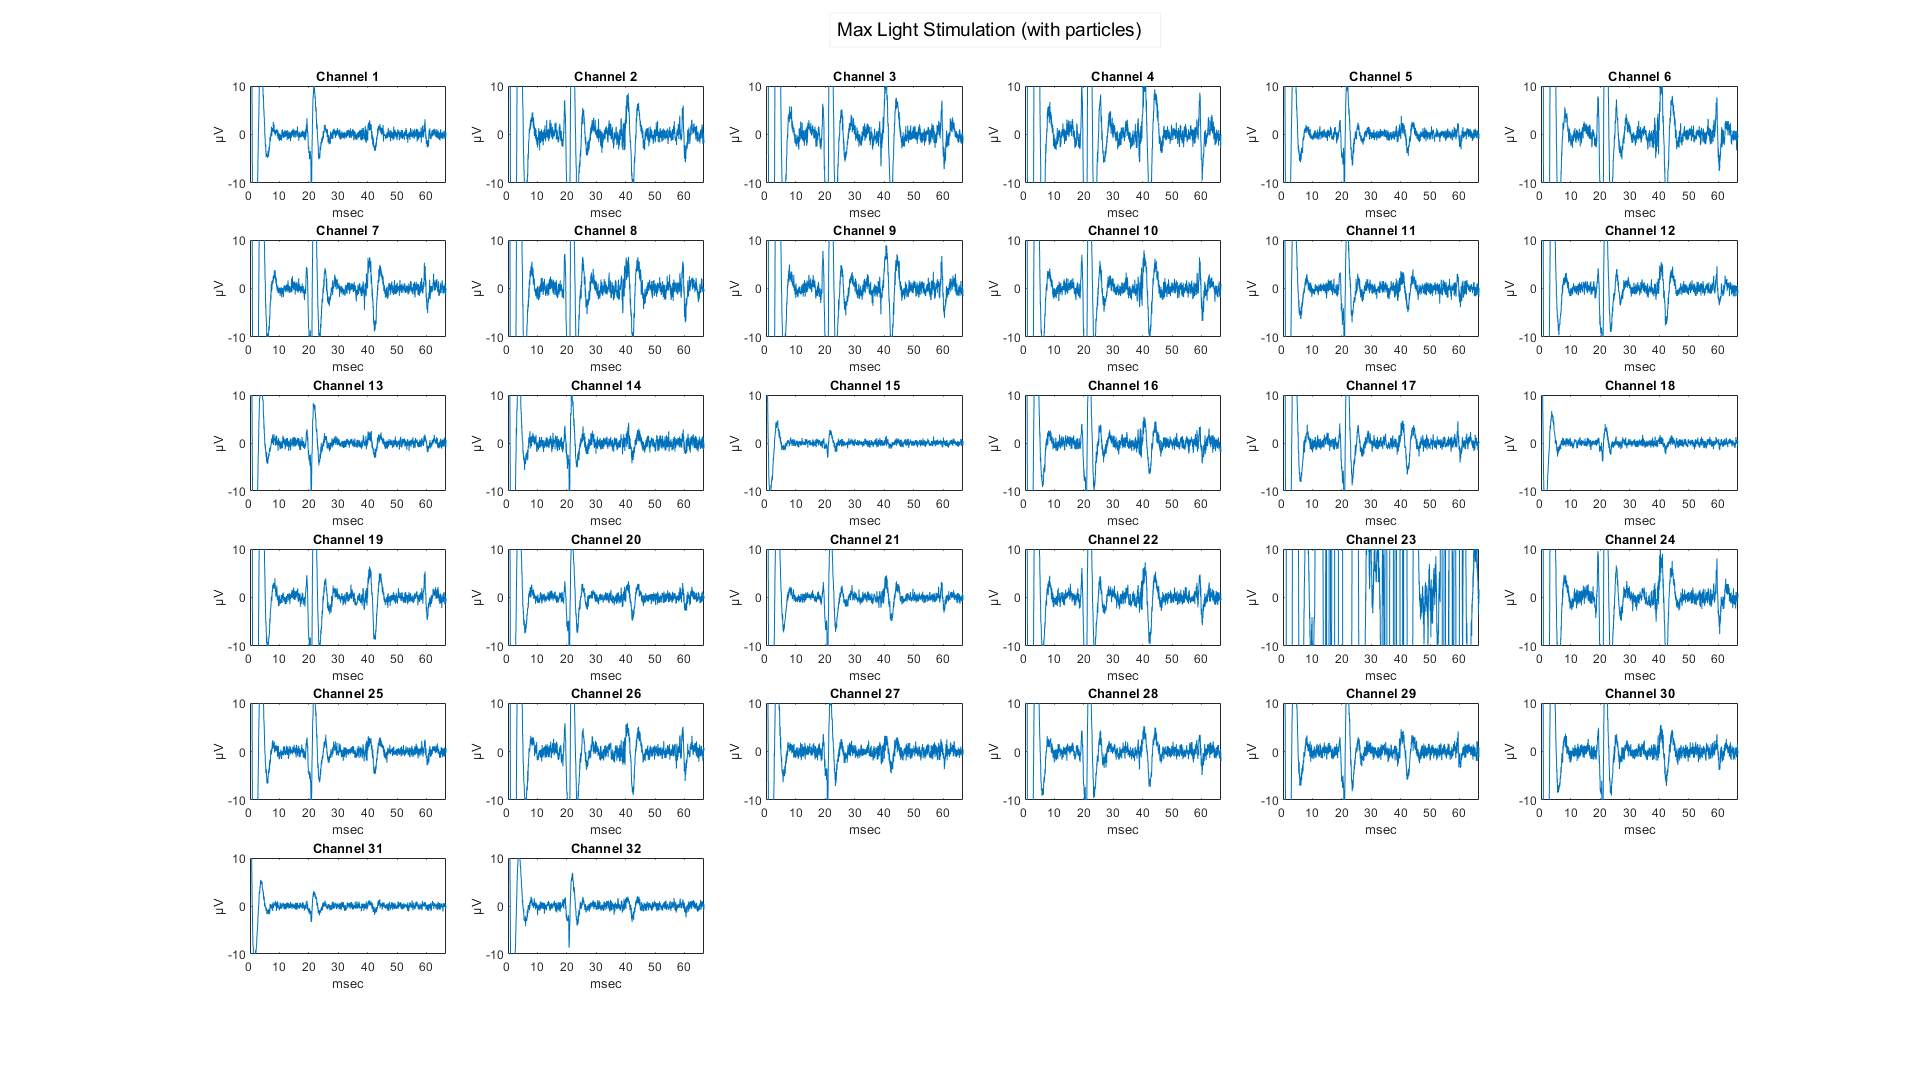


Fig. S6

Stimulation response data of all 32 MEA channels after applying particles with LED stimulation of 1 msec duration. Stimulus artefact and evoked light responses can be seen on all channels, except channel 23 which malfunctioned. All evoked potentials display larger peak-peak amplitude than before particle application.


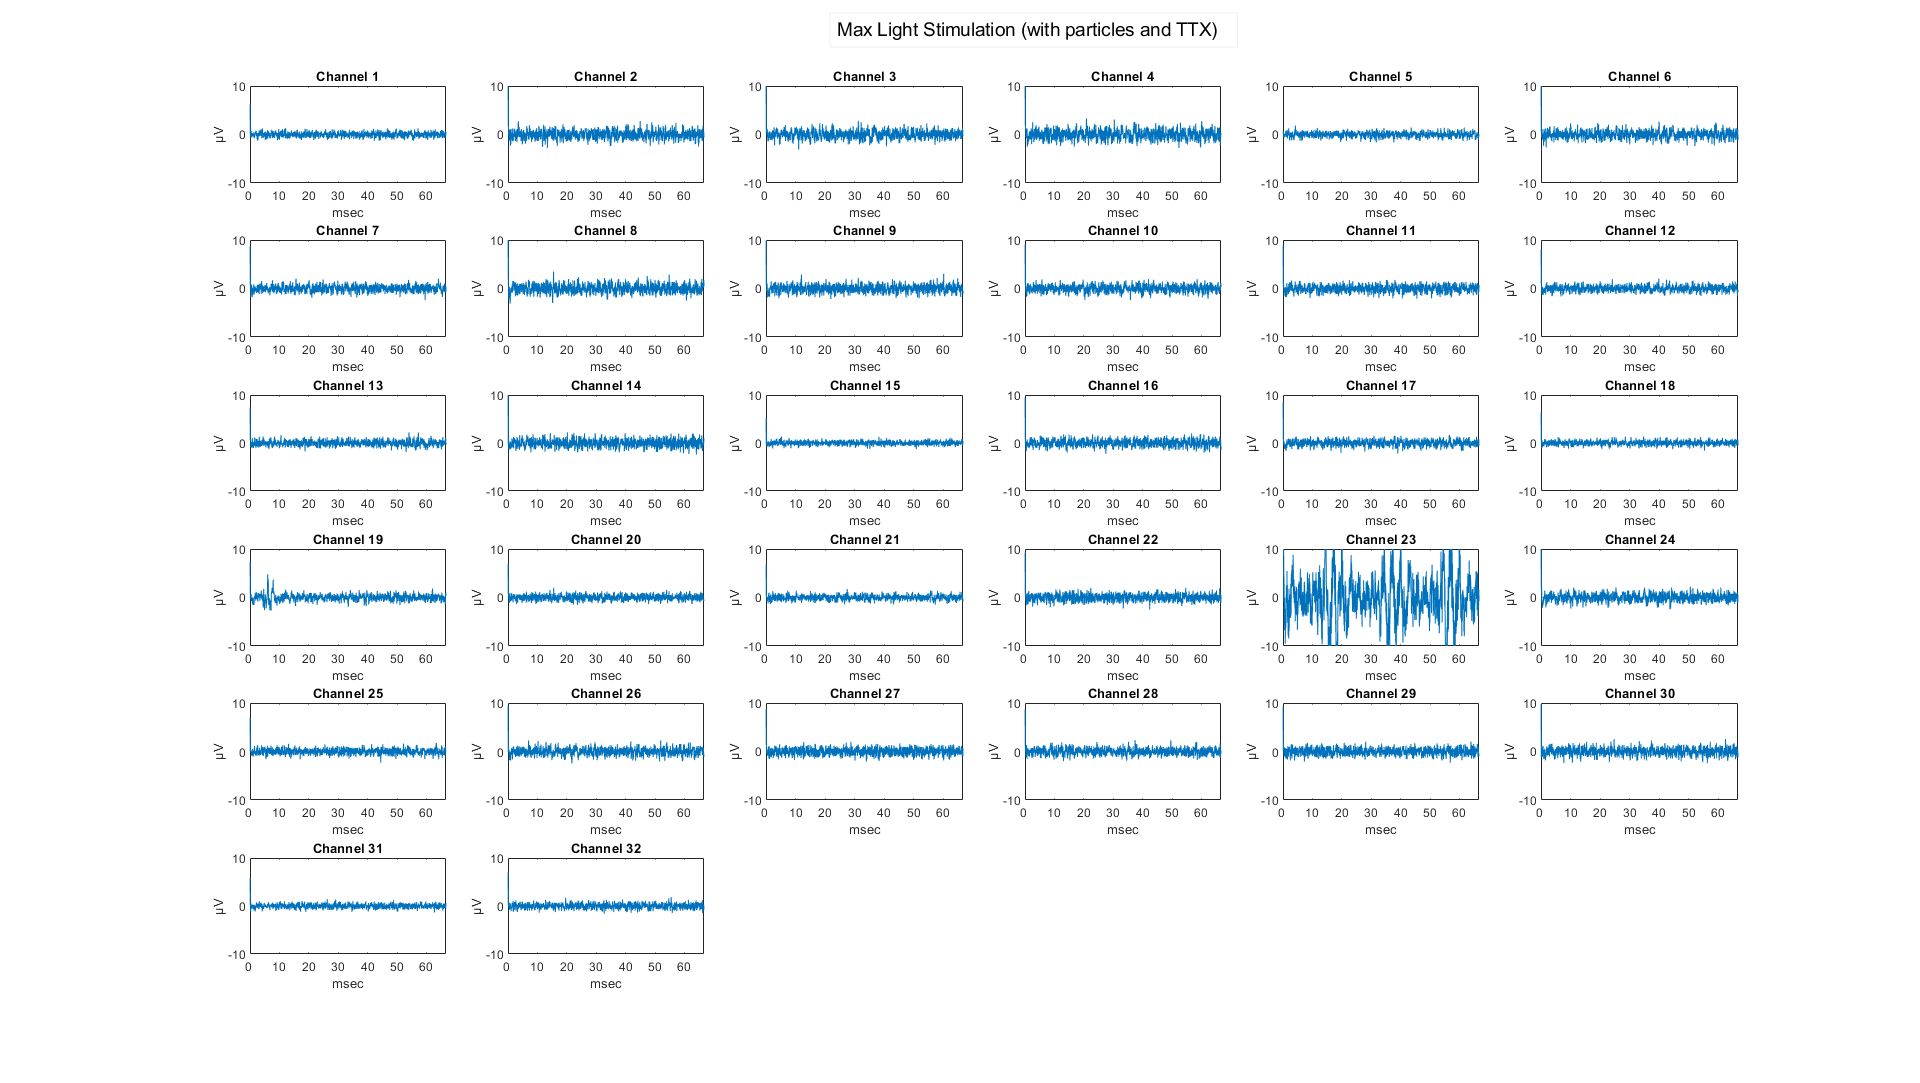
Fig. S7

Stimulation response data of all 32 MEA channels after applying TTX with LED stimulation of 1 msec duration. Stimulus artefact can still be seen after TTX application, but no clear evoked potentials are visible on any channel.

**Video descriptions**

**S1 hg-C3N4 Internalization**

Internalization of hg-C3N4 by single NIH/3T3 fibroblast cell

**S2 Laser stimulation of NIH/3T3 fibroblasts** **without hg-C3N4 NPs**

Laser stimulation of 4 NIH/3T3 fibroblast cells as non-particle control with 200 ms laser pulse, 473 nm, spot size 3 µm, and 8.8 mW/µm2. Green fluorescence is calcium staining.

**S3 Laser stimulation of NIH/3T3 fibroblast cell with hg-C3N4 NPs**

Laser stimulation of internalized hg-C3N4 NPs of single NIH/3T3 fibroblast cell with 200 ms laser pulse, 473 nm, spot size 3 µm, and 8.8 mW/µm2. Green fluorescence is calcium staining and hg-C3N4 NPs. Red arrow indicates location of laser stimulation.

**S4 Laser stimulation of NIH/3T3 fibroblast cell with hg-C3N4 NPs as ΔF/F0 video.**

ΔF/F0 video of laser stimulation of internalized hg-C3N4 NPs of single NIH/3T3 fibroblast cell with 200 ms laser pulse, 473 nm, spot size 3 µm, and 8.8 mW/µm2. ΔF/F0 video is generated based on Supplementary video S3.

**S5 Laser stimulation of HELA cell with hg-C3N4 NPs**

Laser stimulation of internalized hg-C3N4 NPs of single NIH/3T3 fibroblast cell with 200 ms laser pulse, 473 nm, spot size 3 µm, and 8.8 mW/µm2. Green fluorescence is calcium staining and hg-C3N4 NPs. Red arrow indicates location of laser stimulation.

**S6 Laser stimulation of HELA cell with hg-C3N4 NPs as ΔF/F0 video.**

Laser stimulation of internalized hg-C3N4 NPs of single NIH/3T3 fibroblast cell with 200 ms laser pulse, 473 nm, spot size 3 µm, and 8.8 mW/µm2. ΔF/F0 video is generated based on Supplementary video S5.

**S7** **Laser stimulation and signal propagation of CMs with hg-C3N4 NPs**

Laser stimulation of CM with hg-C3N4 NPs resulting in immediate intracellular calcium flux and beating in all 4 adjacent CMs. Stimulation with 200 ms laser pulse, 473 nm, spot size 3 µm, and 8.8 mW/µm2. Green fluorescence is calcium staining and hg-C3N4 NPs. Red arrow indicates location of laser stimulation.

**S8** **Laser stimulation and signal propagation of CFs with hg-C3N4 NPs**

Laser stimulation of CF with hg-C3N4 NPs resulting in immediate intracellular calcium flux and signal propagation to adjacent CF. Stimulation with 200 ms laser pulse, 473 nm, spot size 3 µm, and 8.8 mW/µm2. Green fluorescence is calcium staining and hg-C3N4 NPs. Red arrow indicates location of laser stimulation.

**S9** **Laser stimulation and signal propagation of CF to CM with hg-C3N4 NPs**

Laser stimulation of CF with hg-C3N4 NPs resulting in immediate intracellular calcium flux and signal propagation to adjacent CM. Stimulation with 200 ms laser pulse, 473 nm, spot size 3 µm, and 8.8 mW/µm2. Green fluorescence is calcium staining and hg-C3N4 NPs. Red arrow indicates location of laser stimulation.

**S10 Pacing of HL1 CM cell calcium dynamics via LED stimulation of hg-C3N4 NPs: calcium dynamics before stimulation.**

HL1 cell calcium dynamics before application of LED stimulation. Green fluorescence is calcium staining.

**S11 Pacing of HL1 CM cell calcium dynamics via LED stimulation of hg-C3N4 NPs: after 10 min stimulation.**

HL1 cell calcium dynamics after application of 10 min pulsed LED stimulation. Green fluorescence is calcium staining. Light source was 10 mW/cm2 of 450 nm with pulse width of 100 ms and 1 Hz frequency.

**S12 Pacing of HL1 CM cell calcium dynamics via LED stimulation of hg-C3N4 NPs: after 30 min stimulation.**

HL1 cell calcium dynamics after application of 30 min pulsed LED stimulation. Green fluorescence is calcium staining. Light source was 10 mW/cm2 of 450 nm with pulse width of 100 ms and 1 Hz frequency.
